# Supplementary material for: Efficient determination of non-steroidal anti-inflammatory drugs by micellar electrokinetic chromatography in wastewater
Source: Royal Society of Chemistry journal article supplement (doi:10.1039/d2ay01807a), 2023-01-01
Supplement: d2ay01807a1.pdf [file d2ay01807a1.pdf]

## Supplementary Information for Analytical methods

### Efficient determination of non-steroidal anti-inflammatory drugs by micellar electrokinetic chromatography in wastewater

Hanan Alatawi<sup>1</sup>

Anna Hogan<sup>1</sup>

Ibtihaj Albalawi<sup>1</sup>

Samia Alsefri<sup>1</sup>

Eric Moore<sup>1,2</sup>

<sup>1</sup> School of Chemistry, University College Cork, Cork, Ireland

<sup>2</sup> Tyndall National Institute, Cork, Ireland

#### Correspondence to:

Eric Moore

School of Chemistry, University College Cork, Cork, Ireland.

Email: e.moore@ucc.ie

## Supplementary figures

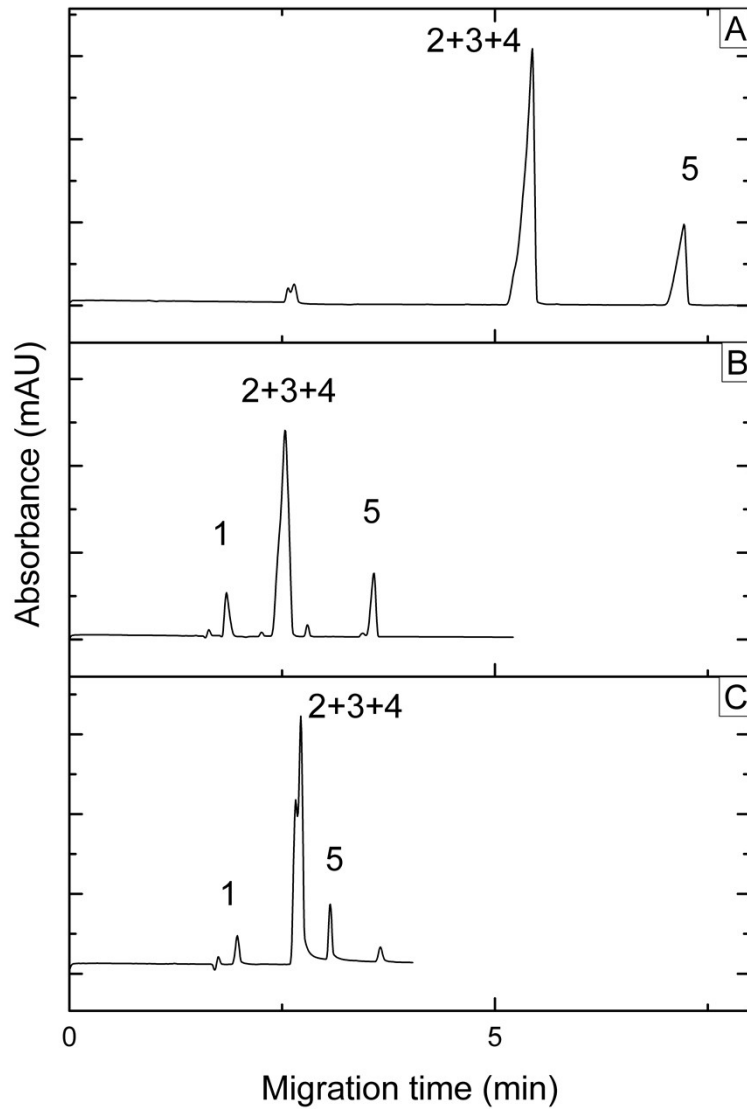

**Figure. S1** Electropherogram of CZE separation: Peak: 1- PAC, 2- DIC, 3-KET, 4- IB, 5- ASA; using different BGE: (A) 20 mM acetate BGE at pH 5.5 , (B) 20 mM phosphate BGE at pH 9, (c) 20 mM borate BGE at pH 9.

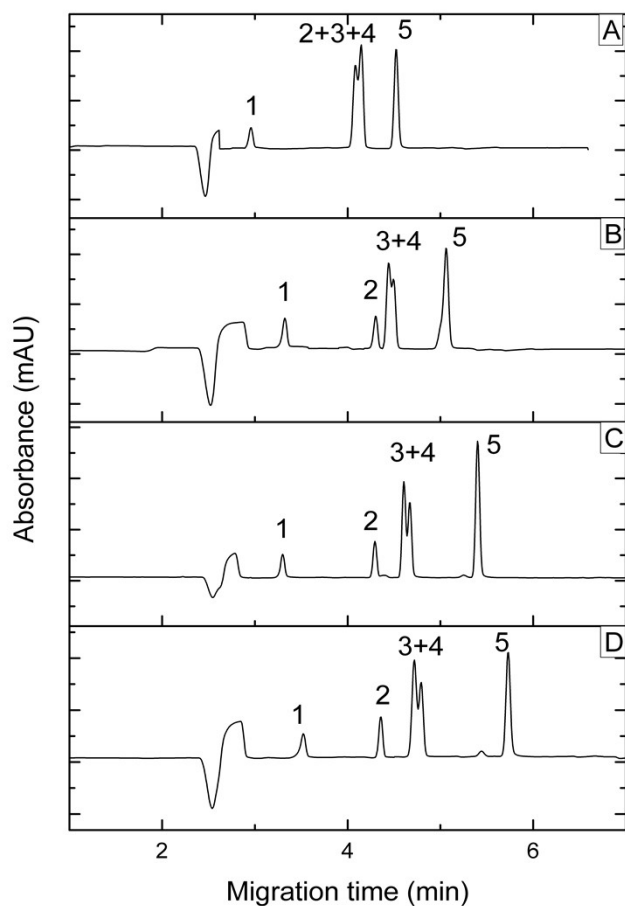

**Figure. S2** MEKC electropherograms show the effect of SDS concentration on the separation of NSAIDs (A) 50 mM, (B) 70 mM, (C) 90 mM, (D) 110 Mm; Peak: 1- PAC, 2- ASA, 3-KET, 4- IB, 5- DIC at concentration of 750  $\mu\text{g/L}$  each; Capillary: 50  $\mu\text{m}$  id 31.5 cm (effective length) 40 cm (total length); BGE: 15 mM borate buffer, pH 9; separation voltage: 15 kV.

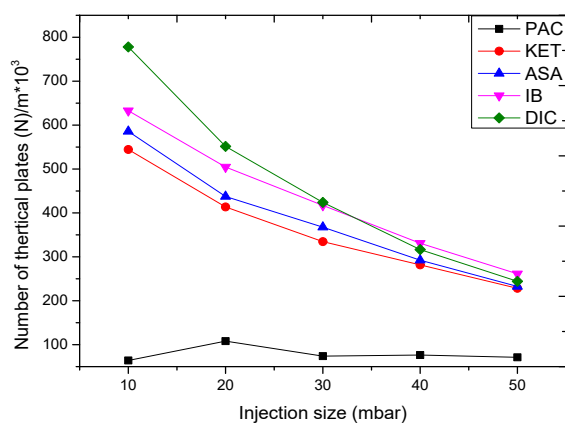

**Figure. S3** The effect of injection size on the efficiency

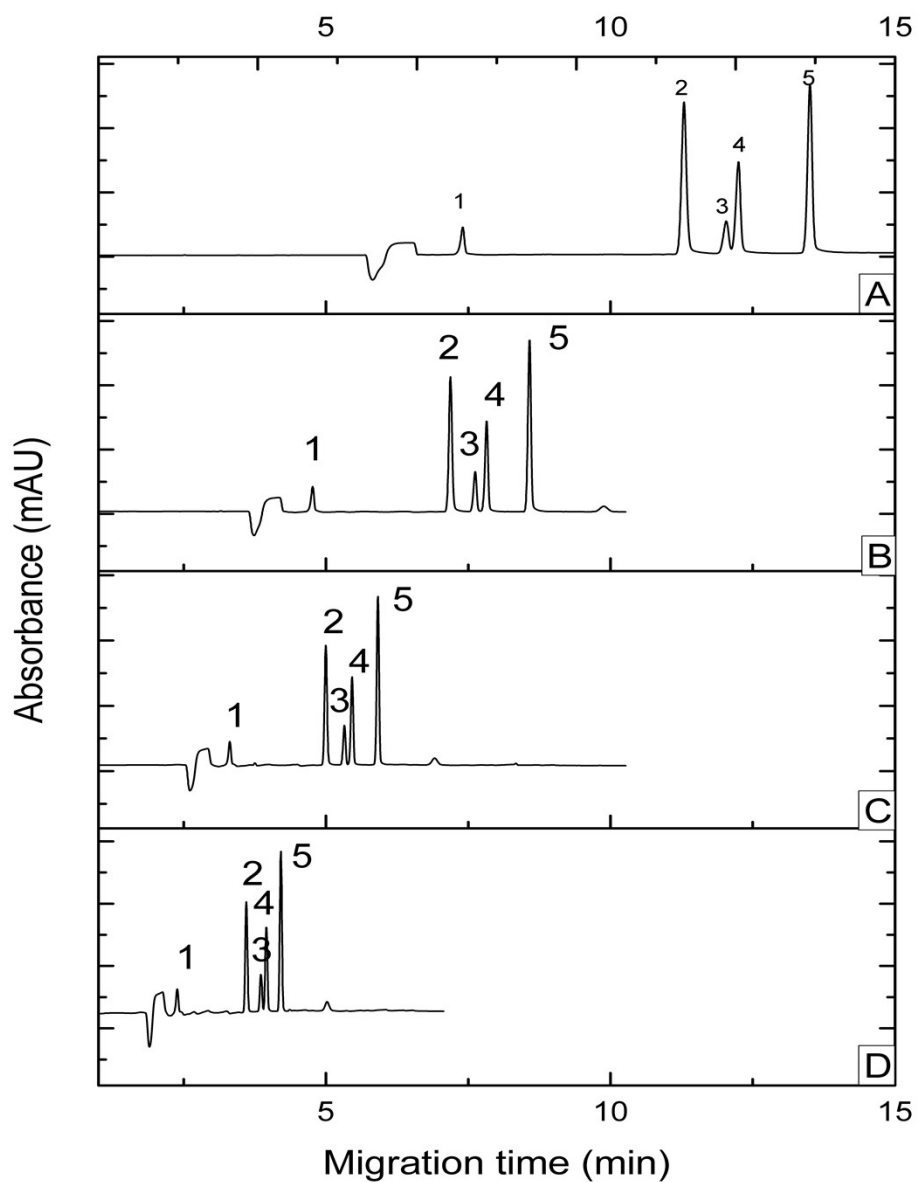

**Figure. S4** MEKC electropherograms show the effect of voltage on the separation of NSAIDs (A) 10, (B) 15, (c) 20, (D) 25 kV; Peak: 1- PAC, 2- ASA, 3-KET, 4- IB, 5- DIC at a concentration of 750  $\mu\text{g/L}$  each; Capillary: 50  $\mu\text{m}$  id 31.5 cm (effective length) 40 cm (total length); BGE: 15 mM borate buffer, pH 9, 90 mM SDS, 10% methanol; separation voltage: 15 kV; hydrodynamic injection: 10 mbar/5s.

**Table S1.** Structures of the investigated compounds

| Analytes | Chemical structure                                                                 | MW     | pKa  |
|----------|------------------------------------------------------------------------------------|--------|------|
| ASA      | 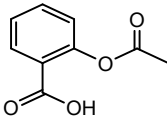  | 180.16 | 3.15 |
| DIC      |   | 318.13 | 4.15 |
| IB       |   | 206.28 | 4.60 |
| KET      |   | 254.28 | 4.0  |
| PAC      |  | 151.16 | 9.5  |

**Table S2.** The recoveries of investigated compounds in (100 µg/L) spiked wastewater samples

| Analyte | Recovery (RSD%)   |                   |
|---------|-------------------|-------------------|
|         | C18               | Oasis HLB         |
|         | Wastewater sample | Wastewater sample |
| IB      | 83.8<br>(13.2%)   | 40 (19%)          |
| KET     | 91.1 (11%)        | 28.1 (24%)        |
| DIC     | 118.1<br>(15.5%)  | 22.7 (28.5%)      |
| ASA     | 36.5<br>(14.7%)   | 65.2 (11.6%)      |
| PAC     | -                 | 122.4 (9.3%)      |
